# Supplementary material for: Epigenetic Regulation of Neural Transmission after Cerebellar Fastigial Nucleus Lesions in Juvenile Rats
Source: PubMed Central journal article supplement (PMC8674159; doi:10.1007/s12311-021-01264-5), 2021-04-08

A) DRD2

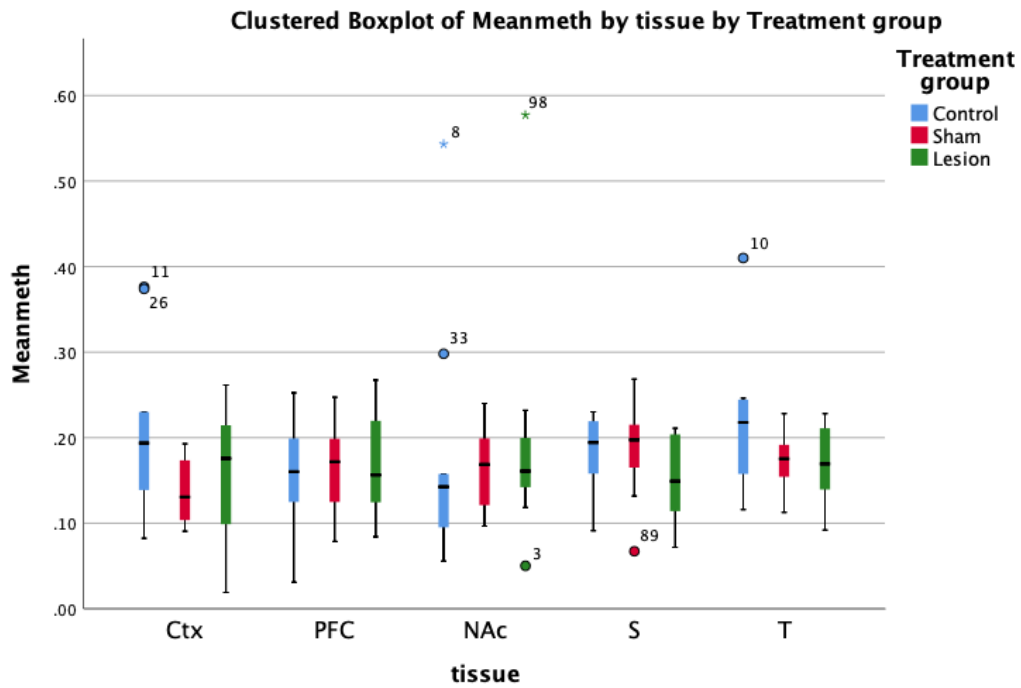

B) DAT

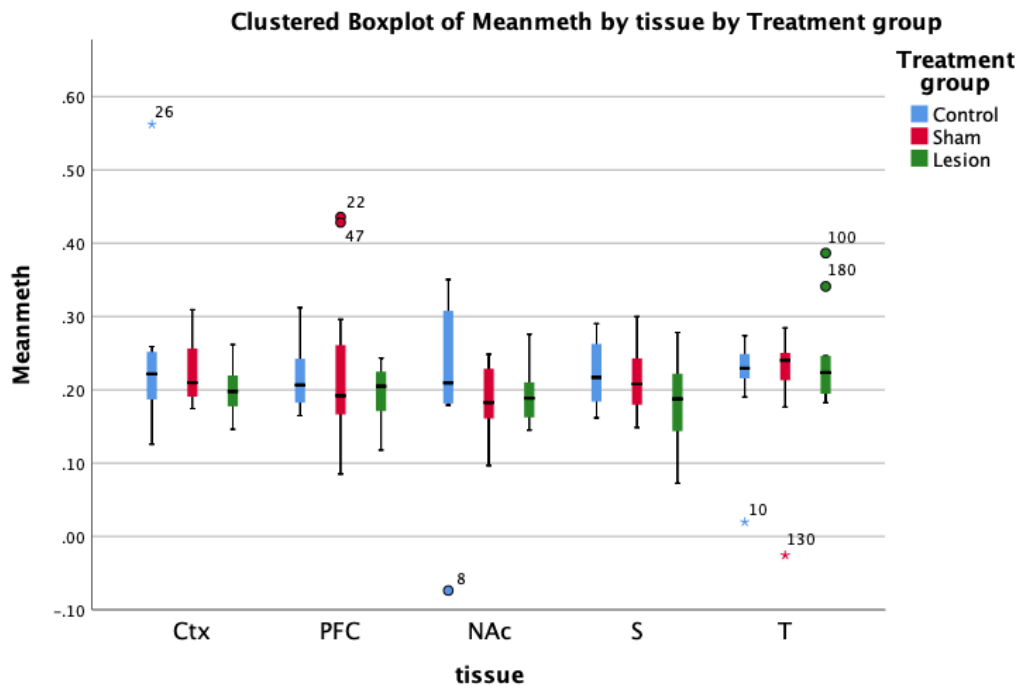

C) Grin1

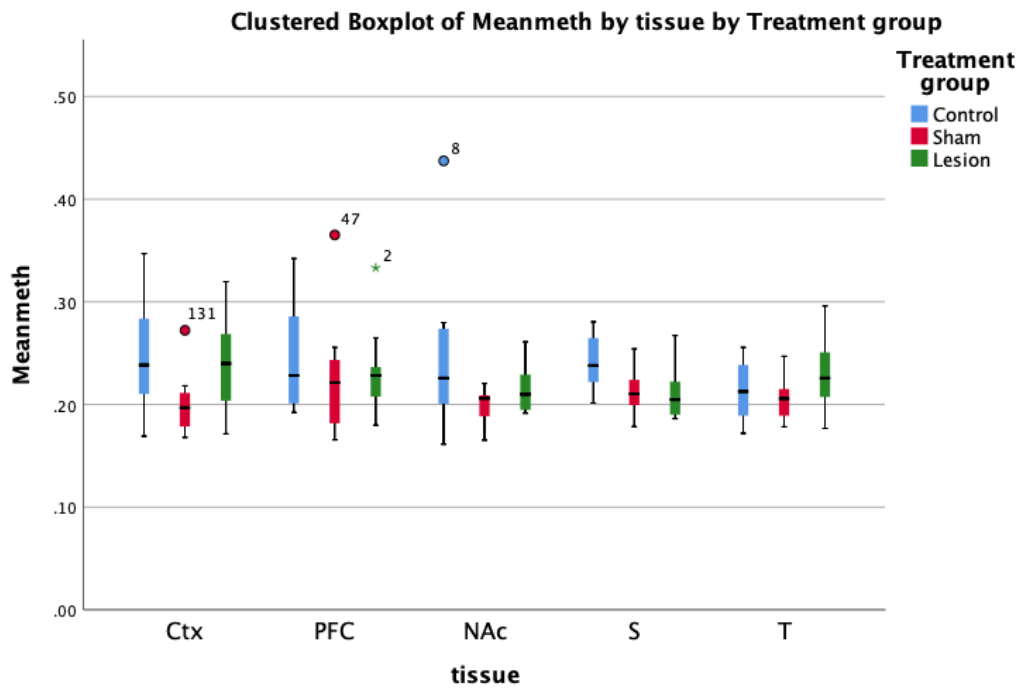

Supplement: 12311_2021_1264_MOESM1_ESM.pdf [file 12311_2021_1264_MOESM1_ESM.pdf]
